# Supplementary material for: Predicting the Pathway Involvement of Metabolites Based on Combined Metabolite and Pathway Features
Source: MDPI journal article supplement (doi:10.3390/metabo14050266), 2024-05-07
Supplement: s1 [file s1]

Table S1 – Hyperparameters.

| Model   | Encoded | Hyperparameter Name      | Hyperparameter Search Range                                              | Hyperparameter Value Selected |
|---------|---------|--------------------------|--------------------------------------------------------------------------|-------------------------------|
| XGBoost | True    | Subsample                | [0.7, 1.0]                                                               | 0.964                         |
|         |         | Max depth                | [15, 25]                                                                 | 17                            |
|         |         | ETA                      | [0.3, 0.5]                                                               | 0.317                         |
|         |         | Minimum split loss       | [0.0, 0.8]                                                               | 0.0159                        |
|         |         | Alpha                    | [1.7, 3.0]                                                               | 1.94                          |
|         |         | Lambda                   | [1.9, 2.5]                                                               | 2.46                          |
|         | False   | Subsample                | [0.7, 1.0]                                                               | 0.983                         |
|         |         | Max depth                | [15, 25]                                                                 | 18                            |
|         |         | ETA                      | [0.3, 0.5]                                                               | 0.319                         |
|         |         | Minimum split loss       | [0.0, 0.8]                                                               | 0.000533                      |
|         |         | Alpha                    | [1.7, 3.0]                                                               | 1.72                          |
|         |         | Lambda                   | [1.9, 2.5]                                                               | 2.46                          |
| MLP     | True    | Activation function      | [SELU, CELU, ELU, PReLU, Leaky ReLU, RReLU, ReLU, ReLU6, SiLU]           | PReLU                         |
|         |         | Normalization layer type | [Batch Normalization, Layer Normalization, Instance Normalization, None] | Batch Normalization           |
|         |         | Loss function            | [Huber, Binary Cross Entropy]                                            | Binary Cross Entropy          |
|         |         | Hidden dimension size    | [50, 4000]                                                               | 479                           |
|         |         | Number of layers         | [1, 6]                                                                   | 6                             |
|         |         | Dropout                  | [0.0, 0.1]                                                               | 0.0498                        |
|         |         | Learning rate            | [10 <sup>-6</sup> , 10 <sup>-3</sup> ]                                   | 0.000245                      |
|         |         | Beta 1                   | [0.0, 0.9999]                                                            | 0.963                         |
|         |         | Beta 2                   | [0.0, 0.9999]                                                            | 0.660                         |
|         |         | Epsilon                  | [10 <sup>-10</sup> , 10 <sup>-3</sup> ]                                  | 0.000769                      |
|         |         | Weight decay             | [0.0, 0.2]                                                               | 2.89 x 10 <sup>-5</sup>       |
|         |         | Classification threshold | [0.3, 0.7]                                                               | 0.671                         |
|         | False   | Activation function      | [SELU, CELU, ELU, PReLU, Leaky ReLU, RReLU, ReLU, ReLU6, SiLU]           | PReLU                         |
|         |         | Normalization layer type | [Batch Normalization, Layer Normalization, Instance Normalization, None] | Batch Normalization           |
|         |         | Loss function            | [Huber, Binary Cross                                                     | Huber                         |

|  |                          |                                         |                       |
|--|--------------------------|-----------------------------------------|-----------------------|
|  |                          | Entropy]                                |                       |
|  | Hidden dimension size    | [50, 4000]                              | 706                   |
|  | Number of layers         | [1, 6]                                  | 5                     |
|  | Dropout                  | [0.0, 0.1]                              | 0.0691                |
|  | Learning rate            | [10 <sup>-6</sup> , 10 <sup>-3</sup> ]  | 0.000273              |
|  | Beta 1                   | [0.0, 0.9999]                           | 0.633                 |
|  | Beta 2                   | [0.0, 0.9999]                           | 0.616                 |
|  | Epsilon                  | [10 <sup>-10</sup> , 10 <sup>-3</sup> ] | 3.95x10 <sup>-6</sup> |
|  | Weight decay             | [0.0, 0.2]                              | 4.30x10 <sup>-5</sup> |
|  | Classification threshold | [0.3, 0.7]                              | 0.493                 |

Figure S1 – Feature importance scores of pathway features compared to corresponding metabolite features.

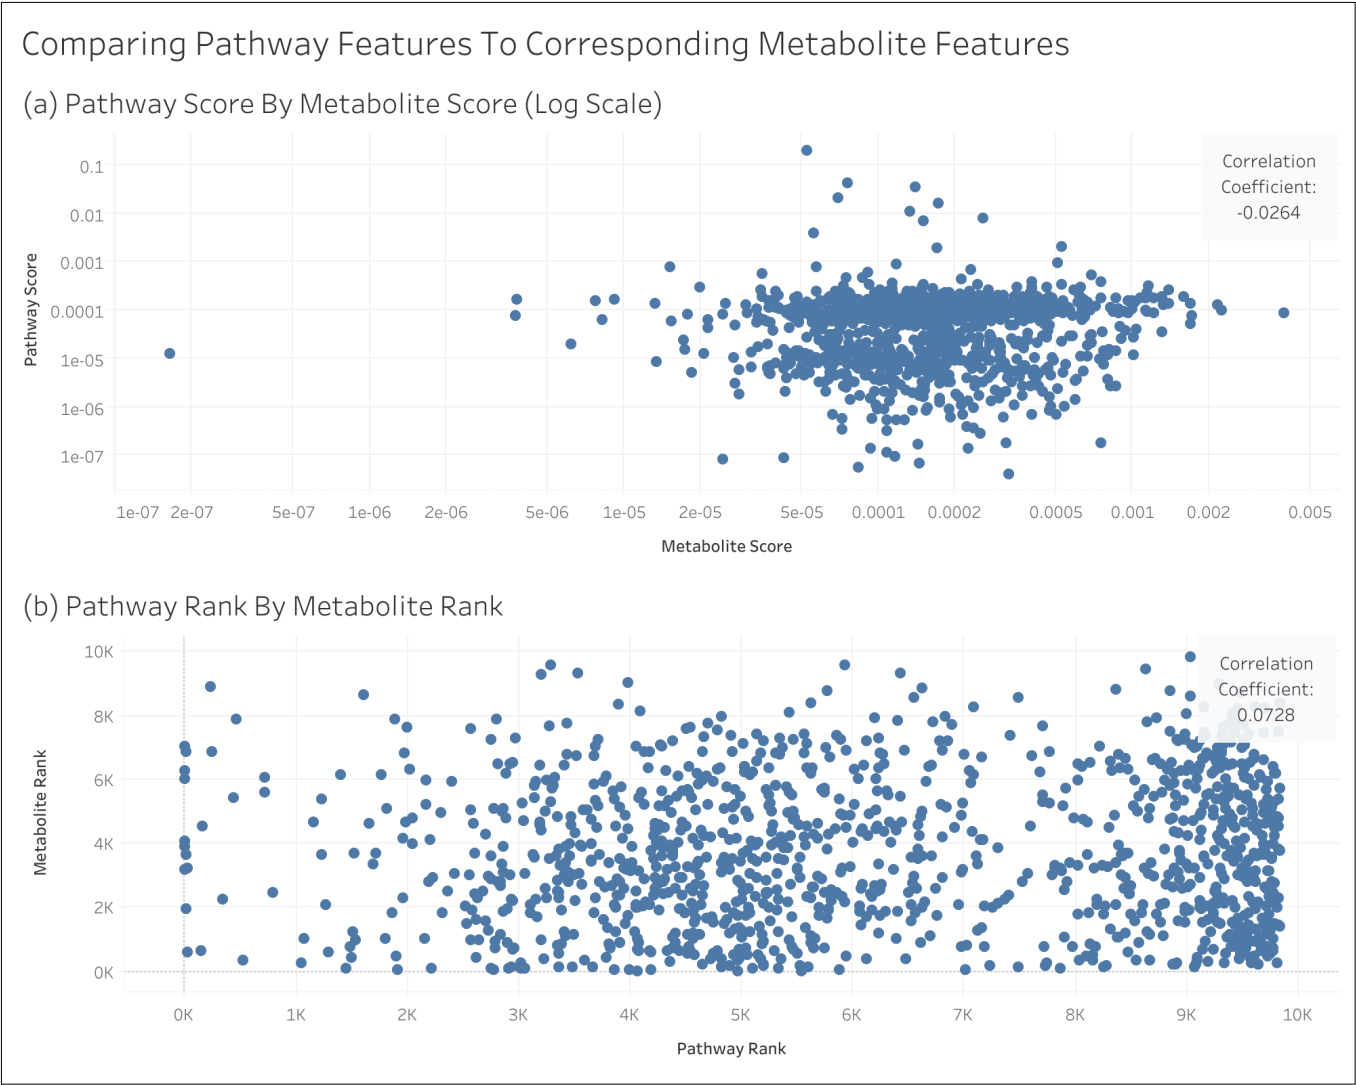

Table S2 – All Metrics And Scores.

| Model | Encoded | Pathway Category | Metric | Average Score | Standard Deviation |
|-------|---------|------------------|--------|---------------|--------------------|
|-------|---------|------------------|--------|---------------|--------------------|

|     |       |                                             |           |        |        |
|-----|-------|---------------------------------------------|-----------|--------|--------|
| MLP | False | ALL                                         | Accuracy  | 0.9592 | 0.0027 |
|     |       |                                             | F1 score  | 0.8069 | 0.0114 |
|     |       |                                             | MCC       | 0.7844 | 0.0129 |
|     |       |                                             | Precision | 0.8128 | 0.0224 |
|     |       |                                             | Recall    | 0.8019 | 0.0193 |
|     |       | Amino acid metabolism                       | Accuracy  | 0.9380 | 0.0103 |
|     |       |                                             | F1 score  | 0.7027 | 0.0485 |
|     |       |                                             | MCC       | 0.6712 | 0.0518 |
|     |       |                                             | Precision | 0.7250 | 0.0711 |
|     |       |                                             | Recall    | 0.6904 | 0.0761 |
|     |       | Biosynthesis of other secondary metabolites | Accuracy  | 0.9329 | 0.0107 |
|     |       |                                             | F1 score  | 0.8716 | 0.0202 |
|     |       |                                             | MCC       | 0.8268 | 0.0268 |
|     |       |                                             | Precision | 0.8710 | 0.0354 |
|     |       |                                             | Recall    | 0.8737 | 0.0305 |
|     |       | Carbohydrate metabolism                     | Accuracy  | 0.9619 | 0.0089 |
|     |       |                                             | F1 score  | 0.7920 | 0.0473 |
|     |       |                                             | MCC       | 0.7736 | 0.0504 |
|     |       |                                             | Precision | 0.7849 | 0.0716 |
|     |       |                                             | Recall    | 0.8074 | 0.0732 |
|     |       | Chemical structure transformation maps      | Accuracy  | 0.9149 | 0.0126 |
|     |       |                                             | F1 score  | 0.4295 | 0.0667 |
|     |       |                                             | MCC       | 0.3879 | 0.0696 |
|     |       |                                             | Precision | 0.4539 | 0.0838 |
|     |       |                                             | Recall    | 0.4193 | 0.0868 |
|     |       | Energy metabolism                           | Accuracy  | 0.9754 | 0.0067 |
|     |       |                                             | F1 score  | 0.5751 | 0.1031 |
|     |       |                                             | MCC       | 0.5707 | 0.1035 |
|     |       |                                             | Precision | 0.6152 | 0.1400 |
|     |       |                                             | Recall    | 0.5662 | 0.1351 |
|     |       | Glycan biosynthesis and metabolism          | Accuracy  | 0.9729 | 0.0073 |
|     |       |                                             | F1 score  | 0.7674 | 0.0568 |
|     |       |                                             | MCC       | 0.7560 | 0.0589 |
|     |       |                                             | Precision | 0.7562 | 0.0858 |
|     |       |                                             | Recall    | 0.7894 | 0.0801 |
|     |       | Lipid metabolism                            | Accuracy  | 0.9792 | 0.0074 |

|  |      |                                           |           |        |        |
|--|------|-------------------------------------------|-----------|--------|--------|
|  |      |                                           | F1 score  | 0.9138 | 0.0288 |
|  |      |                                           | MCC       | 0.9029 | 0.0320 |
|  |      |                                           | Precision | 0.9094 | 0.0507 |
|  |      |                                           | Recall    | 0.9210 | 0.0373 |
|  |      | Metabolism of cofactors and vitamins      | Accuracy  | 0.9555 | 0.0087 |
|  |      |                                           | F1 score  | 0.7620 | 0.0451 |
|  |      |                                           | MCC       | 0.7403 | 0.0481 |
|  |      |                                           | Precision | 0.7897 | 0.0712 |
|  |      |                                           | Recall    | 0.7435 | 0.0691 |
|  |      | Metabolism of other amino acids           | Accuracy  | 0.9650 | 0.0079 |
|  |      |                                           | F1 score  | 0.6042 | 0.0802 |
|  |      |                                           | MCC       | 0.5937 | 0.0813 |
|  |      |                                           | Precision | 0.6738 | 0.1159 |
|  |      |                                           | Recall    | 0.5631 | 0.1021 |
|  |      | Metabolism of terpenoids and polyketides  | Accuracy  | 0.9646 | 0.0081 |
|  |      |                                           | F1 score  | 0.9080 | 0.0206 |
|  |      |                                           | MCC       | 0.8867 | 0.0251 |
|  |      |                                           | Precision | 0.9087 | 0.0363 |
|  |      |                                           | Recall    | 0.9089 | 0.0316 |
|  |      | Nucleotide metabolism                     | Accuracy  | 0.9866 | 0.0051 |
|  |      |                                           | F1 score  | 0.7685 | 0.0835 |
|  |      |                                           | MCC       | 0.7680 | 0.0816 |
|  |      |                                           | Precision | 0.7934 | 0.1259 |
|  |      |                                           | Recall    | 0.7680 | 0.1187 |
|  |      | Xenobiotics biodegradation and metabolism | Accuracy  | 0.9634 | 0.0089 |
|  |      |                                           | F1 score  | 0.8884 | 0.0262 |
|  |      |                                           | MCC       | 0.8677 | 0.0305 |
|  |      |                                           | Precision | 0.8947 | 0.0470 |
|  |      |                                           | Recall    | 0.8853 | 0.0431 |
|  | True | ALL                                       | Accuracy  | 0.9551 | 0.0032 |
|  |      |                                           | F1 score  | 0.7942 | 0.0124 |
|  |      |                                           | MCC       | 0.7695 | 0.0139 |
|  |      |                                           | Precision | 0.7759 | 0.0235 |
|  |      |                                           | Recall    | 0.8140 | 0.0177 |
|  |      | Amino acid metabolism                     | Accuracy  | 0.9240 | 0.0140 |
|  |      |                                           | F1 score  | 0.6699 | 0.0486 |
|  |      |                                           | MCC       | 0.6327 | 0.0520 |

|  |  |                                             |           |        |        |
|--|--|---------------------------------------------|-----------|--------|--------|
|  |  |                                             | Precision | 0.6344 | 0.0773 |
|  |  |                                             | Recall    | 0.7228 | 0.0790 |
|  |  | Biosynthesis of other secondary metabolites | Accuracy  | 0.9265 | 0.0123 |
|  |  |                                             | F1 score  | 0.8597 | 0.0224 |
|  |  |                                             | MCC       | 0.8110 | 0.0296 |
|  |  |                                             | Precision | 0.8577 | 0.0422 |
|  |  |                                             | Recall    | 0.8641 | 0.0344 |
|  |  | Carbohydrate metabolism                     | Accuracy  | 0.9592 | 0.0095 |
|  |  |                                             | F1 score  | 0.7879 | 0.0444 |
|  |  |                                             | MCC       | 0.7694 | 0.0467 |
|  |  |                                             | Precision | 0.7487 | 0.0724 |
|  |  |                                             | Recall    | 0.8400 | 0.0640 |
|  |  | Chemical structure transformation maps      | Accuracy  | 0.9199 | 0.0178 |
|  |  |                                             | F1 score  | 0.5139 | 0.0601 |
|  |  |                                             | MCC       | 0.4789 | 0.0621 |
|  |  |                                             | Precision | 0.5049 | 0.0956 |
|  |  |                                             | Recall    | 0.5505 | 0.1069 |
|  |  | Energy metabolism                           | Accuracy  | 0.9755 | 0.0065 |
|  |  |                                             | F1 score  | 0.5878 | 0.0973 |
|  |  |                                             | MCC       | 0.5814 | 0.0982 |
|  |  |                                             | Precision | 0.6065 | 0.1288 |
|  |  |                                             | Recall    | 0.5924 | 0.1253 |
|  |  | Glycan biosynthesis and metabolism          | Accuracy  | 0.9740 | 0.0065 |
|  |  |                                             | F1 score  | 0.7763 | 0.0546 |
|  |  |                                             | MCC       | 0.7650 | 0.0565 |
|  |  |                                             | Precision | 0.7635 | 0.0793 |
|  |  |                                             | Recall    | 0.7979 | 0.0749 |
|  |  | Lipid metabolism                            | Accuracy  | 0.9770 | 0.0066 |
|  |  |                                             | F1 score  | 0.9053 | 0.0263 |
|  |  |                                             | MCC       | 0.8930 | 0.0292 |
|  |  |                                             | Precision | 0.8943 | 0.0450 |
|  |  |                                             | Recall    | 0.9188 | 0.0358 |
|  |  | Metabolism of cofactors and vitamins        | Accuracy  | 0.9477 | 0.0100 |
|  |  |                                             | F1 score  | 0.7264 | 0.0481 |
|  |  |                                             | MCC       | 0.7001 | 0.0517 |
|  |  |                                             | Precision | 0.7387 | 0.0751 |

|         |       |                                             |           |        |        |
|---------|-------|---------------------------------------------|-----------|--------|--------|
|         |       |                                             | Recall    | 0.7228 | 0.0701 |
|         |       | Metabolism of other amino acids             | Accuracy  | 0.9590 | 0.0095 |
|         |       |                                             | F1 score  | 0.5890 | 0.0796 |
|         |       |                                             | MCC       | 0.5733 | 0.0812 |
|         |       |                                             | Precision | 0.5819 | 0.1083 |
|         |       |                                             | Recall    | 0.6168 | 0.1104 |
|         |       | Metabolism of terpenoids and polyketides    | Accuracy  | 0.9605 | 0.0089 |
|         |       |                                             | F1 score  | 0.8979 | 0.0227 |
|         |       |                                             | MCC       | 0.8741 | 0.0275 |
|         |       |                                             | Precision | 0.8930 | 0.0399 |
|         |       |                                             | Recall    | 0.9047 | 0.0334 |
|         |       | Nucleotide metabolism                       | Accuracy  | 0.9853 | 0.0059 |
|         |       |                                             | F1 score  | 0.7584 | 0.0866 |
|         |       |                                             | MCC       | 0.7571 | 0.0856 |
|         |       |                                             | Precision | 0.7513 | 0.1305 |
|         |       |                                             | Recall    | 0.7889 | 0.1126 |
|         |       | Xenobiotics biodegradation and metabolism   | Accuracy  | 0.9526 | 0.0112 |
|         |       |                                             | F1 score  | 0.8604 | 0.0299 |
|         |       |                                             | MCC       | 0.8339 | 0.0347 |
|         |       |                                             | Precision | 0.8410 | 0.0569 |
|         |       |                                             | Recall    | 0.8853 | 0.0452 |
| XGBoost | False | ALL                                         | Accuracy  | 0.9564 | 0.0023 |
|         |       |                                             | F1 score  | 0.7871 | 0.0115 |
|         |       |                                             | MCC       | 0.7637 | 0.0126 |
|         |       |                                             | Precision | 0.8185 | 0.0134 |
|         |       |                                             | Recall    | 0.7583 | 0.0159 |
|         |       | Amino acid metabolism                       | Accuracy  | 0.9267 | 0.0105 |
|         |       |                                             | F1 score  | 0.6506 | 0.0484 |
|         |       |                                             | MCC       | 0.6110 | 0.0525 |
|         |       |                                             | Precision | 0.6640 | 0.0584 |
|         |       |                                             | Recall    | 0.6415 | 0.0616 |
|         |       | Biosynthesis of other secondary metabolites | Accuracy  | 0.9156 | 0.0113 |
|         |       |                                             | F1 score  | 0.8368 | 0.0224 |
|         |       |                                             | MCC       | 0.7803 | 0.0293 |
|         |       |                                             | Precision | 0.8437 | 0.0308 |
|         |       |                                             | Recall    | 0.8311 | 0.0300 |
|         |       | Carbohydrate metabolism                     | Accuracy  | 0.9641 | 0.0077 |

|  |  |                                          |           |        |        |
|--|--|------------------------------------------|-----------|--------|--------|
|  |  |                                          | y         |        |        |
|  |  |                                          | F1 score  | 0.8042 | 0.0421 |
|  |  |                                          | MCC       | 0.7857 | 0.0454 |
|  |  |                                          | Precision | 0.7911 | 0.0570 |
|  |  |                                          | Recall    | 0.8214 | 0.0539 |
|  |  | Chemical structure transformation maps   | Accuracy  | 0.9289 | 0.0104 |
|  |  |                                          | F1 score  | 0.4462 | 0.0692 |
|  |  |                                          | MCC       | 0.4221 | 0.0722 |
|  |  |                                          | Precision | 0.5645 | 0.0933 |
|  |  |                                          | Recall    | 0.3743 | 0.0711 |
|  |  | Energy metabolism                        | Accuracy  | 0.9776 | 0.0061 |
|  |  |                                          | F1 score  | 0.5532 | 0.1105 |
|  |  |                                          | MCC       | 0.5578 | 0.1090 |
|  |  |                                          | Precision | 0.6962 | 0.1370 |
|  |  |                                          | Recall    | 0.4723 | 0.1220 |
|  |  | Glycan biosynthesis and metabolism       | Accuracy  | 0.9763 | 0.0062 |
|  |  |                                          | F1 score  | 0.7800 | 0.0581 |
|  |  |                                          | MCC       | 0.7701 | 0.0599 |
|  |  |                                          | Precision | 0.8219 | 0.0699 |
|  |  |                                          | Recall    | 0.7476 | 0.0790 |
|  |  | Lipid metabolism                         | Accuracy  | 0.9780 | 0.0058 |
|  |  |                                          | F1 score  | 0.9056 | 0.0248 |
|  |  |                                          | MCC       | 0.8938 | 0.0276 |
|  |  |                                          | Precision | 0.9270 | 0.0314 |
|  |  |                                          | Recall    | 0.8864 | 0.0378 |
|  |  | Metabolism of cofactors and vitamins     | Accuracy  | 0.9540 | 0.0082 |
|  |  |                                          | F1 score  | 0.7336 | 0.0474 |
|  |  |                                          | MCC       | 0.7157 | 0.0491 |
|  |  |                                          | Precision | 0.8298 | 0.0560 |
|  |  |                                          | Recall    | 0.6611 | 0.0636 |
|  |  | Metabolism of other amino acids          | Accuracy  | 0.9589 | 0.0080 |
|  |  |                                          | F1 score  | 0.5181 | 0.0835 |
|  |  |                                          | MCC       | 0.5042 | 0.0856 |
|  |  |                                          | Precision | 0.5974 | 0.1066 |
|  |  |                                          | Recall    | 0.4660 | 0.0920 |
|  |  | Metabolism of terpenoids and polyketides | Accuracy  | 0.9579 | 0.0082 |
|  |  |                                          | F1 score  | 0.8881 | 0.0226 |



|  |      |                                             |           |        |        |
|--|------|---------------------------------------------|-----------|--------|--------|
|  |      |                                             | MCC       | 0.8628 | 0.0271 |
|  |      |                                             | Precision | 0.9060 | 0.0278 |
|  |      |                                             | Recall    | 0.8719 | 0.0329 |
|  |      | Nucleotide metabolism                       | Accuracy  | 0.9874 | 0.0045 |
|  |      |                                             | F1 score  | 0.7754 | 0.0807 |
|  |      |                                             | MCC       | 0.7729 | 0.0807 |
|  |      |                                             | Precision | 0.8128 | 0.1003 |
|  |      |                                             | Recall    | 0.7531 | 0.1086 |
|  |      | Xenobiotics biodegradation and metabolism   | Accuracy  | 0.9516 | 0.0084 |
|  |      |                                             | F1 score  | 0.8510 | 0.0266 |
|  |      |                                             | MCC       | 0.8226 | 0.0309 |
|  |      |                                             | Precision | 0.8615 | 0.0346 |
|  |      |                                             | Recall    | 0.8421 | 0.0371 |
|  | True | ALL                                         | Accuracy  | 0.9414 | 0.0023 |
|  |      |                                             | F1 score  | 0.6747 | 0.0149 |
|  |      |                                             | MCC       | 0.6567 | 0.0152 |
|  |      |                                             | Precision | 0.8233 | 0.0166 |
|  |      |                                             | Recall    | 0.5718 | 0.0184 |
|  |      | Amino acid metabolism                       | Accuracy  | 0.9106 | 0.0116 |
|  |      |                                             | F1 score  | 0.4507 | 0.0611 |
|  |      |                                             | MCC       | 0.4342 | 0.0628 |
|  |      |                                             | Precision | 0.6598 | 0.0845 |
|  |      |                                             | Recall    | 0.3455 | 0.0584 |
|  |      | Biosynthesis of other secondary metabolites | Accuracy  | 0.8850 | 0.0128 |
|  |      |                                             | F1 score  | 0.7591 | 0.0281 |
|  |      |                                             | MCC       | 0.6897 | 0.0344 |
|  |      |                                             | Precision | 0.8355 | 0.0337 |
|  |      |                                             | Recall    | 0.6966 | 0.0369 |
|  |      | Carbohydrate metabolism                     | Accuracy  | 0.9501 | 0.0087 |
|  |      |                                             | F1 score  | 0.6930 | 0.0521 |
|  |      |                                             | MCC       | 0.6723 | 0.0542 |
|  |      |                                             | Precision | 0.7792 | 0.0637 |
|  |      |                                             | Recall    | 0.6283 | 0.0674 |
|  |      | Chemical structure transformation maps      | Accuracy  | 0.9253 | 0.0108 |
|  |      |                                             | F1 score  | 0.2238 | 0.0729 |
|  |      |                                             | MCC       | 0.2580 | 0.0803 |
|  |      |                                             | Precision | 0.5831 | 0.1563 |

|  |  |                                          |           |        |        |
|--|--|------------------------------------------|-----------|--------|--------|
|  |  |                                          | n         |        |        |
|  |  |                                          | Recall    | 0.1413 | 0.0518 |
|  |  | Energy metabolism                        | Accuracy  | 0.9747 | 0.0064 |
|  |  |                                          | F1 score  | 0.3916 | 0.1231 |
|  |  |                                          | MCC       | 0.4312 | 0.1211 |
|  |  |                                          | Precision | 0.7222 | 0.1808 |
|  |  |                                          | Recall    | 0.2781 | 0.1042 |
|  |  | Glycan biosynthesis and metabolism       | Accuracy  | 0.9715 | 0.0068 |
|  |  |                                          | F1 score  | 0.7056 | 0.0663 |
|  |  |                                          | MCC       | 0.7040 | 0.0653 |
|  |  |                                          | Precision | 0.8522 | 0.0736 |
|  |  |                                          | Recall    | 0.6072 | 0.0816 |
|  |  | Lipid metabolism                         | Accuracy  | 0.9612 | 0.0080 |
|  |  |                                          | F1 score  | 0.8184 | 0.0376 |
|  |  |                                          | MCC       | 0.8045 | 0.0387 |
|  |  |                                          | Precision | 0.9272 | 0.0344 |
|  |  |                                          | Recall    | 0.7344 | 0.0535 |
|  |  | Metabolism of cofactors and vitamins     | Accuracy  | 0.9344 | 0.0094 |
|  |  |                                          | F1 score  | 0.5415 | 0.0624 |
|  |  |                                          | MCC       | 0.5504 | 0.0594 |
|  |  |                                          | Precision | 0.8287 | 0.0741 |
|  |  |                                          | Recall    | 0.4054 | 0.0623 |
|  |  | Metabolism of other amino acids          | Accuracy  | 0.9556 | 0.0084 |
|  |  |                                          | F1 score  | 0.3361 | 0.0965 |
|  |  |                                          | MCC       | 0.3589 | 0.0990 |
|  |  |                                          | Precision | 0.6100 | 0.1556 |
|  |  |                                          | Recall    | 0.2380 | 0.0801 |
|  |  | Metabolism of terpenoids and polyketides | Accuracy  | 0.9320 | 0.0101 |
|  |  |                                          | F1 score  | 0.8084 | 0.0298 |
|  |  |                                          | MCC       | 0.7717 | 0.0338 |
|  |  |                                          | Precision | 0.8808 | 0.0333 |
|  |  |                                          | Recall    | 0.7484 | 0.0422 |
|  |  | Nucleotide metabolism                    | Accuracy  | 0.9785 | 0.0059 |
|  |  |                                          | F1 score  | 0.5307 | 0.1220 |
|  |  |                                          | MCC       | 0.5465 | 0.1184 |
|  |  |                                          | Precision | 0.7403 | 0.1546 |
|  |  |                                          | Recall    | 0.4263 | 0.1234 |

|  |  |                                           |           |        |        |
|--|--|-------------------------------------------|-----------|--------|--------|
|  |  | Xenobiotics biodegradation and metabolism | Accuracy  | 0.9182 | 0.0113 |
|  |  |                                           | F1 score  | 0.7177 | 0.0398 |
|  |  |                                           | MCC       | 0.6800 | 0.0428 |
|  |  |                                           | Precision | 0.8294 | 0.0438 |
|  |  |                                           | Recall    | 0.6348 | 0.0524 |
